# Supplementary material for: Risks of mortality and severe coronavirus disease 19 (COVID-19) outcomes in patients with or without systemic lupus erythematosus
Source: PubMed Central journal article supplement — Lupus Sci Med. 2023 Feb 14;10(1):e000750. doi: 10.1136/lupus-2022-000750 (PMC9929928; doi:10.1136/lupus-2022-000750), 2023-02-14
Supplement: lupus-2022-000750supp001.pdf [file lupus-2022-000750supp001.pdf]

Supplementary Table A1. Codes used to identify COVID-19 test, adverse outcomes and other variables of interest.

| Group Description                                   | Diagnosis Codes                                                  | Procedure Codes                                                                                | HCPCS Codes unless otherwise specified                                                                                                                                                                                                                                                                                                                                                                                           |
|-----------------------------------------------------|------------------------------------------------------------------|------------------------------------------------------------------------------------------------|----------------------------------------------------------------------------------------------------------------------------------------------------------------------------------------------------------------------------------------------------------------------------------------------------------------------------------------------------------------------------------------------------------------------------------|
| COVID-19 test (also required positive test results) | U07.1, U07.2,<br>U07.3, B97.29,<br>B97.29 on or after<br>2/20/20 |                                                                                                | HCPCS: 86328, 86769, 87635, G2023,<br>G2024, U0001, U0002, U0003<br><br>LOINC: 94534-5, 94500-6, 94503-0,<br>94505-5, 94506-3, 94504-8, 94507-1,<br>94509-7, 94508-9, 94510-5, 94308-4,<br>94309-2, 94311-8, 94312-6, 94314-2,<br>94315-9, 94316-7, 94533-7, 94531-1,<br>94547-7, 94564-2, 94562-6, 94563-4,<br>94565-9, 94307-6, 94559-2, 94306-8,<br>94558-4, 94511-3                                                          |
| Mechanical Ventilation                              |                                                                  | 5A1955Z,<br>5A1935Z,<br>5A1945Z,<br>5A093, 5A094,<br>5A095,<br>0BH13EZ,<br>0BH17EZ,<br>0BH18EZ | 94002, 94003, 31500                                                                                                                                                                                                                                                                                                                                                                                                              |
| Intensive Care Unit (ICU)                           |                                                                  |                                                                                                | 1) In the "carearea" file where the variable "carearea" included "Intensive Care Unit")<br>2) By Revenue center code in the procedure file:<br><b>0200</b> General classification ICU<br><b>0201</b> Surgical ICU<br><b>0202</b> Medical ICU<br><b>0203</b> Pediatric ICU<br><b>0204</b> Psychiatric ICU<br><b>0206</b> Intermediate ICU<br><b>0207</b> Burn care<br><b>0208</b> Trauma care<br><b>0209</b> Other intensive care |

|                 |  |  |                                                                                                                                                                                                                                       |
|-----------------|--|--|---------------------------------------------------------------------------------------------------------------------------------------------------------------------------------------------------------------------------------------|
|                 |  |  | <b>0210</b> General classification cardiac care unit (CCU)<br><b>0211</b> Myocardial infarction care<br><b>0212</b> Pulmonary care<br><b>0213</b> Heart transplant<br><b>0214</b> Intermediate CCU<br><b>0219</b> Other coronary care |
| Hospitalization |  |  | In the “visit” file where the variable “visit_type” included “Inpatient”.                                                                                                                                                             |

Abbreviations: ICD, International Classification of Diseases; HCPCS, Healthcare Common Procedure Coding System; CPT, Current Procedural Terminology.

Supplementary Table A2. Generic names and HCPCS codes for SLE drugs

| Class                | Mode of delivery | Drug Name                    | HCPCS                                                                                          |
|----------------------|------------------|------------------------------|------------------------------------------------------------------------------------------------|
| Glucocorticoids      | IV               | Dexamethasone                | J1100, J1094                                                                                   |
|                      |                  | Hydrocortisone               | J1710, J1720, J1700 (20mg)                                                                     |
|                      |                  | Methylprednisolone Succinate | J2930, J2920, J1020 (20mg), J1030 (40mg), J1040 (80mg)                                         |
|                      | Oral             | Cortisone Acetate            | N/A                                                                                            |
|                      |                  | Dexamethasone                | N/A                                                                                            |
|                      |                  | Fludrocortisone              | N/A                                                                                            |
|                      |                  | Hydrocortisone               | N/A                                                                                            |
|                      |                  | Methylprednisolone           | J7509 (oral 4mg)                                                                               |
|                      |                  | Prednisolone                 | J7510 (oral 5mg), J7512 (oral 1mg)                                                             |
|                      | IM               | Prednisone                   | J7506 (5mg oral)                                                                               |
|                      |                  | Betamethasone                | J0702 (3mg), J0704 (4mg)                                                                       |
|                      |                  | Triamcinolone Acetonide      | J3300 (acetonide 1mg), J3301 (acetonide 10mg), J3302 (diacetate 5mg), J3303 (hexacetonide 5mg) |
| Biologic Medications | IV               | Rituximab                    | J9310, J9311, J9312                                                                            |
|                      |                  | Belimumab                    | J0490                                                                                          |
|                      | Subcutaneous     | Belimumab                    | N/A                                                                                            |

|                           |              |                       |                                   |
|---------------------------|--------------|-----------------------|-----------------------------------|
| <b>Immunosuppressants</b> | IV           | Azathioprine          | J7501                             |
|                           |              | Cyclophosphamide      | J9070                             |
|                           |              | Mycophenolate mofetil | J7517                             |
|                           |              | Cyclosporine          | J7516                             |
|                           |              | Tacrolimus            | J7525                             |
|                           | Subcutaneous | Methotrexate          | J9250, J9260                      |
|                           | Oral         | Azathioprine          | J7500                             |
|                           |              | Methotrexate          | N/A                               |
|                           |              | Cyclophosphamide      | J8530                             |
|                           |              | Mycophenolate mofetil | N/A                               |
|                           |              | Mycophenolate sodium  | N/A                               |
|                           |              | Cyclosporine          | J7515, J7502                      |
|                           |              | Tacrolimus            | J7503, J7507,<br>J7508            |
|                           | Leflunomide  |                       |                                   |
| <b>Antimalarials</b>      | Oral         | Hydroxychloroquine    | N/A                               |
|                           |              | Quinacrine            | N/A                               |
|                           |              | Chloroquine           | J0390 (injection,<br>up to 250mg) |

HCPCS, Healthcare Common Procedure Coding System.

Supplementary Table A3. Baseline characteristics of unmatched cohorts.

|                                        | SLE<br>N (%) | Control<br>N (%) | P      |
|----------------------------------------|--------------|------------------|--------|
| <b>Total (N)</b>                       | 687          | 579224           |        |
| <b>Age, years</b>                      |              |                  |        |
| 18-39                                  | 167 (24.3)   | 193535 (33.4)    | <0.001 |
| 40-49                                  | 137 (19.9)   | 90929 (15.7)     |        |
| 50-54                                  | 72 (10.5)    | 52023 (9)        |        |
| 55-59                                  | 69 (10)      | 54164 (9.4)      |        |
| 60-64                                  | 89 (13)      | 51937 (9)        |        |
| 65-69                                  | 58 (8.4)     | 41465 (7.2)      |        |
| 70-74                                  | 42 (6.1)     | 32656 (5.6)      |        |
| 75-79                                  | 27 (3.9)     | 23851 (4.1)      |        |
| 80-84                                  | 18 (2.6)     | 17422 (3)        |        |
| 85+                                    | 8 (1.2)      | 21242 (3.7)      |        |
| <b>Gender</b>                          |              |                  |        |
| Female                                 | 631 (91.8)   | 323463 (55.8)    | <0.001 |
| Male                                   | 56 (8.2)     | 255761 (44.2)    |        |
| <b>Race</b>                            |              |                  |        |
| Hispanic                               | 93 (13.5)    | 63733 (11)       | <0.001 |
| NH Asian                               | 11 (1.6)     | 11677 (2)        |        |
| NH Black                               | 232 (33.8)   | 85730 (14.8)     |        |
| NH White                               | 310 (45.1)   | 359945 (62.1)    |        |
| Other / Unknown                        | 41 (6)       | 58139 (10)       |        |
| <b>COVID-19 diagnosis<br/>quarter*</b> |              |                  |        |
| 1                                      | 66 (9.6)     | 33232 (5.7)      | <0.001 |
| 2                                      | 242 (35.2)   | 166647 (28.8)    |        |
| 3                                      | 214 (31.1)   | 192554 (33.2)    |        |
| 4                                      | 165 (24)     | 186791 (32.2)    |        |
| <b>Severe obesity (BMI ≥<br/>40)</b>   |              |                  |        |
| No                                     | 581 (84.6)   | 524820 (90.6)    | <0.001 |
| Yes                                    | 106 (15.4)   | 54404 (9.4)      |        |
| <b>Comorbidities</b>                   |              |                  |        |
| 0                                      | 92 (13.4)    | 366436 (63.3)    | <0.001 |
| 1                                      | 97 (14.1)    | 88991 (15.4)     |        |
| 2+                                     | 498 (72.5)   | 123797 (21.4)    |        |
| <b>Region</b>                          |              |                  |        |
| Midwest                                | 318 (46.3)   | 315836 (54.5)    | <0.001 |
| Northeast                              | 200 (29.1)   | 122761 (21.2)    |        |
| South                                  | 103 (15)     | 89553 (15.5)     |        |
| West                                   | 31 (4.5)     | 27395 (4.7)      |        |
| Other                                  | 35 (5.1)     | 23679 (4.1)      |        |

**Supplementary Table A4. Sensitivity analysis including SLE patients not receiving SLE drug therapy. Baseline characteristics of SLE cases with matched controls diagnosed with COVID-19**

|                                        | SLE<br>N (%) | Control<br>N (%) | P      |
|----------------------------------------|--------------|------------------|--------|
| <b>Total (N)</b>                       | 1209         | 12090            |        |
| <b>Age, years</b>                      |              |                  |        |
| 18-39                                  | 297 (24.6)   | 2970 (24.6)      | 1      |
| 40-49                                  | 241 (19.9)   | 2410 (19.9)      |        |
| 50-54                                  | 131 (10.8)   | 1313 (10.9)      |        |
| 55-59                                  | 121 (10)     | 1204 (10)        |        |
| 60-64                                  | 160 (13.2)   | 1603 (13.3)      |        |
| 65-69                                  | 106 (8.8)    | 1049 (8.7)       |        |
| 70-74                                  | 77 (6.4)     | 772 (6.4)        |        |
| 75-79                                  | 41 (3.4)     | 419 (3.5)        |        |
| 80-84                                  | 25 (2.1)     | 250 (2.1)        |        |
| 85+                                    | 10 (0.8)     | 100 (0.8)        |        |
| <b>Gender</b>                          |              |                  |        |
| Female                                 | 1103 (91.2)  | 11030 (91.2)     | 1      |
| Male                                   | 106 (8.8)    | 1060 (8.8)       |        |
| <b>Race</b>                            |              |                  |        |
| Hispanic                               | 154 (12.7)   | 1540 (12.7)      | 1      |
| NH Asian                               | 22 (1.8)     | 220 (1.8)        |        |
| NH Black                               | 419 (34.7)   | 4190 (34.7)      |        |
| NH White                               | 546 (45.2)   | 5460 (45.2)      |        |
| Other / Unknown                        | 68 (5.6)     | 680 (5.6)        |        |
| <b>COVID-19 diagnosis<br/>quarter*</b> |              |                  |        |
| 1                                      | 99 (8.2)     | 990 (8.2)        | 1      |
| 2                                      | 423 (35)     | 4230 (35)        |        |
| 3                                      | 381 (31.5)   | 3810 (31.5)      |        |
| 4                                      | 306 (25.3)   | 3060 (25.3)      |        |
| <b>Severe obesity (BMI ≥<br/>40)</b>   |              |                  |        |
| No                                     | 1038 (85.9)  | 10388 (85.9)     | 0.95   |
| Yes                                    | 171 (14.1)   | 1702 (14.1)      |        |
| <b>Smoking status</b>                  |              |                  |        |
| Never                                  | 749 (62)     | 8251 (68.2)      | <0.001 |
| Current                                | 232 (19.2)   | 1659 (13.7)      |        |
| Former                                 | 228 (18.9)   | 2180 (18)        |        |
| <b>Comorbidities</b>                   |              |                  |        |
| 0                                      | 293 (24.2)   | 7131 (59)        | <0.001 |
| 1                                      | 206 (17)     | 2200 (18.2)      |        |
| 2+                                     | 710 (58.7)   | 2759 (22.8)      |        |

|                                                                     |             |              |        |
|---------------------------------------------------------------------|-------------|--------------|--------|
| <b>Skilled nurse facility in 3 months before COVID-19 diagnosis</b> |             |              |        |
| No                                                                  | 1188 (98.3) | 12009 (99.3) | <0.001 |
| Yes                                                                 | 21 (1.7)    | 81 (0.7)     |        |
| <b>Insurance</b>                                                    |             |              |        |
| Commercial                                                          | 634 (52.4)  | 6954 (57.5)  | <0.001 |
| Medicare                                                            | 280 (23.2)  | 1604 (13.3)  |        |
| Medicaid                                                            | 117 (9.7)   | 1003 (8.3)   |        |
| Other insurance                                                     | 41 (3.4)    | 567 (4.7)    |        |
| Uninsured                                                           | 1 (0.1)     | 191 (1.6)    |        |
| Unknown                                                             | 136 (11.2)  | 1771 (14.6)  |        |
| <b>Region</b>                                                       |             |              |        |
| Midwest                                                             | 551 (45.6)  | 6136 (50.8)  | <0.001 |
| Northeast                                                           | 363 (30)    | 2672 (22.1)  |        |
| South                                                               | 192 (15.9)  | 2239 (18.5)  |        |
| West                                                                | 59 (4.9)    | 556 (4.6)    |        |
| Other                                                               | 44 (3.6)    | 487 (4)      |        |

Abbreviations: SLE, systemic lupus erythematosus; NH, non-Hispanic; BMI, body mass index; ICU, intensive care unit.

Supplementary Table A5. Sensitivity analysis including SLE patients not receiving SLE drug therapy. COVID-19 outcomes in SLE patients versus matched controls

|                                       | SLE<br>(N = 1209)<br>N (%) | Control<br>(N=12090)<br>N (%) | P       |
|---------------------------------------|----------------------------|-------------------------------|---------|
| <b>30-day mortality</b>               |                            |                               |         |
| Yes                                   | 40 (3.3)                   | 224 (1.9)                     | < 0.001 |
| <b>30-day mechanical ventilation</b>  |                            |                               |         |
| Yes                                   | 49 (4.1)                   | 306 (2.5)                     | 0.002   |
| <b>30-day hospitalization</b>         |                            |                               |         |
| Yes                                   | 319 (26.4)                 | 2143 (17.7)                   | <0.001  |
| <b>30-day ICU without ventilation</b> |                            |                               |         |
| Yes                                   | 78 (6.5)                   | 451 (3.7)                     | <0.001  |

Abbreviations: SLE, systemic lupus erythematosus.



**Supplementary Table A6. Sensitivity analysis including SLE patients not receiving SLE drug therapy. Multivariable logistic regression model of COVID-19 outcomes in SLE patients compared to matched controls**

|                                                  | Model 1 <sup>a</sup><br>Odds Ratio (95%<br>CI) | Model 2 <sup>b</sup><br>Odds Ratio (95%<br>CI) | Model 3 <sup>c</sup><br>Odds Ratio (95%<br>CI) | Model 4 <sup>d</sup><br>Odds Ratio (95%<br>CI) |
|--------------------------------------------------|------------------------------------------------|------------------------------------------------|------------------------------------------------|------------------------------------------------|
| <b>30-day mortality</b>                          |                                                |                                                |                                                |                                                |
| Control                                          | 1                                              | 1                                              | 1                                              | 1                                              |
| SLE                                              | 1.93 (1.35-2.76)                               | 1.91 (1.33-2.74)                               | 1.29 (0.90-1.87)                               | 1.31 (0.87-1.97)                               |
| <b>30-day mechanical ventilation</b>             |                                                |                                                |                                                |                                                |
| Control                                          | 1                                              | 1                                              | 1                                              | 1                                              |
| SLE                                              | 1.62 (1.18-2.24)                               | 1.61 (1.17-2.23)                               | 1.09 (0.78-1.51)                               | 1.09 (0.76-1.58)                               |
| <b>30-day hospitalization</b>                    |                                                |                                                |                                                |                                                |
| Control                                          | 1                                              | 1                                              | 1                                              | 1                                              |
| SLE                                              | 1.67 (1.44-1.93)                               | 1.63 (1.41-1.89)                               | 1.16 (0.99-1.35)                               | 1.21 (1.02-1.42)                               |
| <b>30-day ICU without mechanical ventilation</b> |                                                |                                                |                                                |                                                |
| Control                                          | 1                                              | 1                                              | 1                                              | 1                                              |
| SLE                                              | 1.82 (1.41-2.35)                               | 1.80 (1.39-2.32)                               | 1.23 (0.95-1.61)                               | 1.27 (0.95-1.69)                               |

Abbreviations: SLE, systemic lupus erythematosus; CI: confidence interval.

<sup>a</sup>Model 1 includes adjustments for age, gender, race, COVID-19 quarter diagnosis, insurance, and region.

<sup>b</sup>Model 2 includes adjustments from model 1 and obesity, smoking status, skilled nursing facility admission within three months before COVID-19 diagnosis.

<sup>c</sup>Model 3 includes adjustments from Model 2 and for number of comorbidities (0, 1, or 2+) excluding SLE.

<sup>d</sup>Model 4 includes adjustments for model 2 and for individual comorbidities.

Supplementary Table A7. COVID-19 outcomes among patients with SLE according to baseline characteristics

|                                                       | Total<br>(N=687)<br>N (Column<br>%) | 30-day<br>Mortality<br>(N=25)<br>N (Row %) | P      | 30-d Mechanical<br>Ventilation<br>(N=41)<br>N (Row %) | P      | 30-day<br>Hospitalization<br>(N=213)<br>N (Row %) | P       | 30-day ICU<br>Excluding<br>Ventilation<br>(N=49)<br>N (Row %) | P      |
|-------------------------------------------------------|-------------------------------------|--------------------------------------------|--------|-------------------------------------------------------|--------|---------------------------------------------------|---------|---------------------------------------------------------------|--------|
| <b>Garris index</b>                                   |                                     |                                            |        |                                                       |        |                                                   |         |                                                               |        |
| Mild                                                  | 371 (54)                            | 10 (2.7)                                   | 0.15   | 14 (3.8)                                              | <0.001 | 88 (23.7)                                         | <0.001  | 27 (7.3)                                                      | 0.93   |
| Moderate                                              | 212 (30.9)                          | 8 (3.8)                                    |        | 11 (5.2)                                              |        | 69 (32.5)                                         |         | 14 (6.6)                                                      |        |
| Severe                                                | 104 (15.1)                          | 7 (6.7)                                    |        | 16 (15.4)                                             |        | 56 (53.8)                                         |         | 8 (7.7)                                                       |        |
| <b>Age</b>                                            |                                     |                                            |        |                                                       |        |                                                   |         |                                                               |        |
| 18-49                                                 | 304 (44.3)                          | 4 (1.3)                                    | 0.002* | 17 (5.6)                                              | 0.80   | 75 (24.7)                                         | < 0.001 | 15 (4.9)                                                      | 0.002* |
| 50-59                                                 | 141 (20.5)                          | 5 (3.5)                                    |        | 7 (5.0)                                               |        | 36 (25.5)                                         |         | 5 (3.5)                                                       |        |
| 60-69                                                 | 147 (21.4)                          | 7 (4.8)                                    |        | 10 (6.8)                                              |        | 59 (40.1)                                         |         | 14 (9.5)                                                      |        |
| 70-79                                                 | 69 (10.0)                           | 5 (7.2)                                    |        | 6 (8.7)                                               |        | 29 (42)                                           |         | 10 (14.5)                                                     |        |
| 80+                                                   | 26 (3.8)                            | 4 (15.4)                                   |        | 1 (3.8)                                               |        | 14 (53.8)                                         |         | 5 (19.2)                                                      |        |
| <b>Sex</b>                                            |                                     |                                            |        |                                                       |        |                                                   |         |                                                               |        |
| Female                                                | 631 (91.8)                          | 23 (3.6)                                   | 1.0*   | 38 (6)                                                | 1.0*   | 192 (30.4)                                        | 0.27    | 42 (6.7)                                                      | 0.10   |
| Male                                                  | 56 (8.2)                            | 2 (3.6)                                    |        | 3 (5.4)                                               |        | 21 (37.5)                                         |         | 7 (12.5)                                                      |        |
| <b>Race and ethnicity</b>                             |                                     |                                            |        |                                                       |        |                                                   |         |                                                               |        |
| Hispanic                                              | 93 (13.5)                           | 2 (2.2)                                    | 0.55*  | 4 (4.3)                                               | 0.42*  | 43 (46.2)                                         | <0.001  | 11 (11.8)                                                     | 0.18*  |
| NH Asian                                              | 11 (1.6)                            | 0                                          |        | 0                                                     |        | 0                                                 |         | 0                                                             |        |
| NH Black                                              | 232 (33.8)                          | 12 (5.2)                                   |        | 18 (7.8)                                              |        | 78 (33.6)                                         |         | 11 (4.7)                                                      |        |
| NH White                                              | 310 (45.1)                          | 11 (3.5)                                   |        | 15 (4.8)                                              |        | 78 (25.2)                                         |         | 23 (7.4)                                                      |        |
| Other / Unknown                                       | 41 (6.0)                            | 0                                          |        | 4 (9.8)                                               |        | 14 (34.1)                                         |         | 4 (9.8)                                                       |        |
| <b>COVID-19 diagnosis<br/>quarter</b>                 |                                     |                                            |        |                                                       |        |                                                   |         |                                                               |        |
| 1                                                     | 66 (9.6)                            | 3 (4.5)                                    | 0.68*  | 10 (15.2)                                             | 0.008  | 27 (40.9)                                         | < 0.001 | 4 (6.1)                                                       | 0.93*  |
| 2                                                     | 242 (35.2)                          | 7 (2.9)                                    |        | 14 (5.8)                                              |        | 111 (45.9)                                        |         | 19 (7.9)                                                      |        |
| 3                                                     | 214 (31.1)                          | 7 (3.3)                                    |        | 11 (5.1)                                              |        | 46 (21.5)                                         |         | 16 (7.5)                                                      |        |
| 4                                                     | 165 (24.0)                          | 8 (4.8)                                    |        | 6 (3.6)                                               |        | 29 (17.6)                                         |         | 10 (6.1)                                                      |        |
| <b>SNF in 3 months<br/>before COVID<br/>diagnosis</b> |                                     |                                            |        |                                                       |        |                                                   |         |                                                               |        |
| No                                                    | 671 (97.7)                          | 22 (3.3)                                   | 0.02*  | 37 (5.5)                                              | 0.02*  | 206 (30.7)                                        | 0.26    | 48 (7.2)                                                      | 1.0*   |

|                                  |            |          |       |          |       |            |         |           |       |
|----------------------------------|------------|----------|-------|----------|-------|------------|---------|-----------|-------|
| Yes                              | 16 (2.3)   | 3 (18.8) |       | 4 (25.0) |       | 7 (43.8)   |         | 1 (6.3)   |       |
| <b>Severe obesity (BMI ≥ 40)</b> |            |          |       |          |       |            |         |           |       |
| No                               | 581 (84.6) | 23 (4.0) | 0.40* | 31 (5.3) | 0.10  | 182 (31.3) | 0.67    | 47 (8.1)  | 0.02  |
| Yes                              | 106 (15.4) | 2 (1.9)  |       | 10 (9.4) |       | 31 (29.2)  |         | 2 (1.9)   |       |
| <b>Smoking status</b>            |            |          |       |          |       |            |         |           |       |
| Never                            | 400 (58.2) | 14 (3.5) | 0.72* | 20 (5.0) | 0.15  | 104 (26.0) | < 0.001 | 25 (6.3)  | 0.56  |
| Current                          | 137 (19.9) | 4 (2.9)  |       | 13 (9.5) |       | 67 (48.9)  |         | 11 (8.0)  |       |
| Former                           | 150 (21.8) | 7 (4.7)  |       | 8 (5.3)  |       | 42 (28.0)  |         | 13 (8.7)  |       |
| <b>Insurance</b>                 |            |          |       |          |       |            |         |           |       |
| Commercial                       | 338 (49.2) | 9 (2.7)  | 0.38* | 23 (6.8) | 0.52* | 114 (33.7) | 0.002   | 21 (6.2)  | 0.44* |
| Medicare                         | 170 (24.7) | 8 (4.7)  |       | 11 (6.5) |       | 62 (36.5)  |         | 18 (10.6) |       |
| Medicaid                         | 77 (11.2)  | 3 (3.9)  |       | 2 (2.6)  |       | 12 (15.6)  |         | 4 (5.2)   |       |
| Other insurance                  | 23 (3.3)   | 2 (8.7)  |       | 2 (8.7)  |       | 9 (39.1)   |         | 1 (4.3)   |       |
| Unknown                          | 79 (11.5)  | 3 (3.8)  |       | 3 (3.8)  |       | 16 (20.3)  |         | 5 (6.3)   |       |
| <b>Region</b>                    |            |          |       |          |       |            |         |           |       |
| Midwest                          | 318 (46.3) | 10 (3.1) | 0.38* | 18 (5.7) | 0.08* | 74 (23.3)  | <0.001  | 22 (6.9)  | 0.12* |
| Northeast                        | 200 (29.1) | 7 (3.5)  |       | 7 (3.5)  |       | 85 (42.5)  |         | 16 (8.0)  |       |
| South                            | 103 (15.0) | 5 (4.9)  |       | 8 (7.8)  |       | 36 (35.0)  |         | 3 (2.9)   |       |
| West                             | 31 (4.5)   | 0        |       | 4 (12.9) |       | 8 (25.8)   |         | 5 (16.1)  |       |
| Other                            | 35 (5.1)   | 3 (8.6)  |       | 4 (11.4) |       | 10 (28.6)  |         | 3 (8.6)   |       |

Abbreviations: SLE, systemic lupus erythematosus; NH, non-Hispanic; BMI, body mass index; ICU, intensive care unit; SNF, skilled nurse facility.

\*Fisher's exact test.

Supplementary Table A8. Unadjusted rates of COVID-19 outcomes according to treatment in patients with SLE

|                                                                             | Total<br>(N=687)<br>N (Column %) | 30-day<br>Mortality<br>(N=25)<br>N (Row %) | P     | 30-d<br>Mechanical<br>Ventilation<br>(N=41)<br>N (Row %) | P     | 30-day<br>Hospitalization<br>(N=213)<br>N (Row %) | P      | 30-day ICU<br>excluding<br>Ventilation<br>(N=49)<br>N (Row %) | P     |
|-----------------------------------------------------------------------------|----------------------------------|--------------------------------------------|-------|----------------------------------------------------------|-------|---------------------------------------------------|--------|---------------------------------------------------------------|-------|
| <b>Steroid average daily dose (mg) in 1 month before COVID-19 diagnosis</b> |                                  |                                            |       |                                                          |       |                                                   |        |                                                               |       |
| 0                                                                           | 600 (87.3)                       | 22 (3.7)                                   | 0.63* | 32 (5.3)                                                 | 0.12* | 173 (28.8)                                        | 0.002  | 39 (6.5)                                                      | 0.14* |
| >0 to <7.5                                                                  | 71 (10.3)                        | 2 (2.8)                                    |       | 7 (9.9)                                                  |       | 35 (49.3)                                         |        | 9 (12.7)                                                      |       |
| ≥7.5                                                                        | 16 (2.3)                         | 1 (6.3)                                    |       | 2 (12.5)                                                 |       | 5 (31.3)                                          |        | 1 (6.3)                                                       |       |
| <b>Steroid in 3 months before COVID-19 diagnosis</b>                        |                                  |                                            |       |                                                          |       |                                                   |        |                                                               |       |
| No                                                                          | 498 (72.5)                       | 15 (3.0)                                   | 0.15  | 24 (4.8)                                                 | 0.04  | 130 (26.1)                                        | <0.001 | 27 (5.4)                                                      | 0.005 |
| Yes                                                                         | 189 (27.5)                       | 10 (5.3)                                   |       | 17 (9.0)                                                 |       | 83 (43.9)                                         |        | 22 (11.6)                                                     |       |
| <b>Biologics</b>                                                            |                                  |                                            |       |                                                          |       |                                                   |        |                                                               |       |
| No                                                                          | 631 (91.8)                       | 25 (4.0)                                   | 0.25* | 39 (6.2)                                                 | 0.57* | 197 (31.2)                                        | 0.68   | 45 (7.1)                                                      | 1.0*  |
| Yes                                                                         | 56 (8.2)                         | 0                                          |       | 2 (3.6)                                                  |       | 16 (28.6)                                         |        | 4 (7.1)                                                       |       |
| <b>Immunosuppressants</b>                                                   |                                  |                                            |       |                                                          |       |                                                   |        |                                                               |       |
| No                                                                          | 436 (63.5)                       | 15 (3.4)                                   | 0.71  | 27 (6.2)                                                 | 0.74  | 119 (27.3)                                        | 0.006  | 32 (7.3)                                                      | 0.78  |
| Yes                                                                         | 251 (36.5)                       | 10 (4.0)                                   |       | 14 (5.6)                                                 |       | 94 (37.5)                                         |        | 17 (6.8)                                                      |       |
| <b>Anti-malarials</b>                                                       |                                  |                                            |       |                                                          |       |                                                   |        |                                                               |       |
| No                                                                          | 379 (55.2)                       | 15 (4.0)                                   | 0.62  | 20 (5.3)                                                 | 0.39  | 121 (31.9)                                        | 0.56   | 32 (8.4)                                                      | 0.14  |
| Yes                                                                         | 308 (44.8)                       | 10 (3.2)                                   |       | 21 (6.8)                                                 |       | 92 (29.9)                                         |        | 17 (5.5)                                                      |       |
| <b>Any SLE treatment**</b>                                                  |                                  |                                            |       |                                                          |       |                                                   |        |                                                               |       |
| No                                                                          | 224 (32.6)                       | 8 (3.6)                                    | 0.94  | 16 (7.1)                                                 | 0.36  | 54 (24.1)                                         | 0.007  | 15 (6.7)                                                      | 0.76  |
| Yes                                                                         | 463 (67.4)                       | 17 (3.7)                                   |       | 25 (5.4)                                                 |       | 159 (34.3)                                        |        | 34 (7.3)                                                      |       |

Abbreviations: SLE, Systemic Lupus Erythematosus; ICU, intensive care unit.

\*Fisher's exact test.

Except for steroids as specified, other treatments were evaluated in 6 months before COVID-19 diagnosis.

\*\*Any steroids in 3 months or any biologics, immunosuppressants, anti-malarials in 6 months before COVID-19 diagnosis.

**Supplementary Table A9. Sensitivity analysis of unadjusted rates of composite severe outcomes according to treatment for patients diagnosed with COVID-19**

|                                                                     | Total (N=1209)<br>N (Column %) | No 30-Day<br>Outcome<br>(N=852)<br>N (Row %) | Any 30-Day<br>Outcome<br>(Death,<br>Mechanical<br>Ventilation, ICU,<br>Hospitalization)<br>(N=357)<br>N (Row %) | P      |
|---------------------------------------------------------------------|--------------------------------|----------------------------------------------|-----------------------------------------------------------------------------------------------------------------|--------|
| <b>Steroids average dose in one month before COVID-19 diagnosis</b> |                                |                                              |                                                                                                                 |        |
| None                                                                | 1099 (90.9)                    | 786 (71.5)                                   | 313 (28.5)                                                                                                      | 0.02   |
| Low >0 and <7.5                                                     | 92 (7.6)                       | 53 (57.6)                                    | 39 (42.4)                                                                                                       |        |
| Median-high ≥7.5                                                    | 18 (1.5)                       | 13 (72.2)                                    | 5 (27.8)                                                                                                        |        |
| <b>Steroids in 3 months before COVID-19 diagnosis</b>               |                                |                                              |                                                                                                                 |        |
| No                                                                  | 947 (78.3)                     | 700 (73.9)                                   | 247 (26.1)                                                                                                      | <0.001 |
| Yes                                                                 | 262 (21.7)                     | 152 (58)                                     | 110 (42)                                                                                                        |        |
| <b>Azathioprine</b>                                                 |                                |                                              |                                                                                                                 |        |
| No                                                                  | 1130 (93.5)                    | 797 (70.5)                                   | 333 (29.5)                                                                                                      | 0.86   |
| Yes                                                                 | 79 (6.5)                       | 55 (69.6)                                    | 24 (30.4)                                                                                                       |        |
| <b>Cyclophosphamide</b>                                             |                                |                                              |                                                                                                                 |        |
| No                                                                  | 1195 (98.8)                    | 843 (70.5)                                   | 352 (29.5)                                                                                                      | 0.56*  |
| Yes                                                                 | 14 (1.2)                       | 9 (64.3)                                     | 5 (35.7)                                                                                                        |        |
| <b>Cyclosporine</b>                                                 |                                |                                              |                                                                                                                 |        |
| No                                                                  | 1177 (97.4)                    | 830 (70.5)                                   | 347 (29.5)                                                                                                      | 0.83   |
| Yes                                                                 | 32 (2.6)                       | 22 (68.8)                                    | 10 (31.3)                                                                                                       |        |
| <b>Methotrexate</b>                                                 |                                |                                              |                                                                                                                 |        |
| No                                                                  | 1120 (92.6)                    | 781 (69.7)                                   | 339 (30.3)                                                                                                      | 0.046  |
| Yes                                                                 | 89 (7.4)                       | 71 (79.8)                                    | 18 (20.2)                                                                                                       |        |

|                                     |             |            |            |       |
|-------------------------------------|-------------|------------|------------|-------|
| <b>Mycophenolate</b>                |             |            |            |       |
| No                                  | 1045 (86.4) | 754 (72.2) | 291 (27.8) | 0.001 |
| Yes                                 | 164 (13.6)  | 98 (59.8)  | 66 (40.2)  |       |
| <b>Leflunomide</b>                  |             |            |            |       |
| No                                  | 1182 (97.8) | 835 (70.6) | 347 (29.4) | 0.39  |
| Yes                                 | 27 (2.2)    | 17 (63)    | 10 (37)    |       |
| <b>Tacrolimus</b>                   |             |            |            |       |
| No                                  | 1155 (95.5) | 822 (71.2) | 333 (28.8) | 0.01  |
| Yes                                 | 54 (4.5)    | 30 (55.6)  | 24 (44.4)  |       |
| <b>Rituximab</b>                    |             |            |            |       |
| No                                  | 1186 (98.1) | 840 (70.8) | 346 (29.2) | 0.05  |
| Yes                                 | 23 (1.9)    | 12 (52.2)  | 11 (47.8)  |       |
| <b>Belimumab</b>                    |             |            |            |       |
| No                                  | 1160 (95.9) | 814 (70.2) | 346 (29.8) | 0.27  |
| Yes                                 | 49 (4.1)    | 38 (77.6)  | 11 (22.4)  |       |
| <b>Antimalarials</b>                |             |            |            |       |
| No                                  | 622 (51.4)  | 422 (67.8) | 200 (32.2) | 0.04  |
| Yes                                 | 587 (48.6)  | 430 (73.3) | 157 (26.7) |       |
| <b>Any of the lupus treatment**</b> |             |            |            |       |
| No                                  | 422 (34.9)  | 299 (70.9) | 123 (29.1) | 0.83  |
| Yes                                 | 787 (65.1)  | 553 (70.3) | 234 (29.7) |       |

Abbreviations: SLE, systemic lupus erythematosus; ICU, intensive care unit.

\*Fisher's exact test.

Except for steroids as specified, other treatments were evaluated in 6 months before COVID-19 diagnosis.

\*\*Any steroids in 3 months or any biologics, immunosuppressants, anti-malarials in 6 months before COVID-19 diagnosis.
